# Supplementary material for: Genetic structure of wild pea (Pisum sativum subsp. elatius) populations in the northern part of the Fertile Crescent reflects moderate cross-pollination and strong effect of geographic but not environmental distance
Source: PubMed Central journal article supplement (PMC5868773; doi:10.1371/journal.pone.0194056), 2018-03-26

### S3 Table

Summary of DARTseq analysis. Percentage of observed (Hobs), expected (Hexp) and missing datapoints derived from all and polymorphic DARTseq loci per 14 studied populations are shown

|                               | Total<br>(187) | Baglica<br>(15) | Eskiyaygir<br>(11) | Buyukatli<br>(12) | Gurbuz<br>(18) | Hisarkaya<br>(14) | Kozludere<br>(15) | Kebapci<br>(19) | Kilavuzlu<br>(6) | Kahraman-<br>Maras West<br>(13) | Kokluce<br>(14) | Midyat<br>(13) | Dagbasi<br>(10) | Dogukent<br>(5) | Yesilkoy<br>(22) |
|-------------------------------|----------------|-----------------|--------------------|-------------------|----------------|-------------------|-------------------|-----------------|------------------|---------------------------------|-----------------|----------------|-----------------|-----------------|------------------|
| mean Hobs                     | 0.03           | 0.01            | 0.02               | 0.02              | 0.02           | 0.02              | 0.04              | 0.01            | 0.03             | 0.02                            | 0.07            | 0.02           | 0.03            | 0.07            | 0.03             |
| mean Hexp of polymorphic loci | 0.18           | 0.13            | 0.32               | 0.27              | 0.10           | 0.14              | 0.28              | 0.08            | 0.22             | 0.26                            | 0.27            | 0.18           | 0.32            | 0.40            | 0.31             |
| missing data                  | 0.15           | 0.12            | 0.13               | 0.15              | 0.16           | 0.16              | 0.18              | 0.13            | 0.18             | 0.21                            | 0.12            | 0.17           | 0.11            | 0.12            | 0.14             |
| polymorphic loci              | 0.50           | 0.07            | 0.28               | 0.17              | 0.20           | 0.20              | 0.26              | 0.04            | 0.12             | 0.26                            | 0.46            | 0.12           | 0.27            | 0.22            | 0.44             |
| samples in population         | 187            | 15              | 11                 | 12                | 18             | 14                | 15                | 19              | 6                | 13                              | 14              | 13             | 10              | 5               | 22               |
| number of polymorphic loci    | 40818          | 2962            | 11516              | 7034              | 8039           | 8271              | 10684             | 1525            | 4840             | 10629                           | 18658           | 4698           | 11103           | 8811            | 17788            |

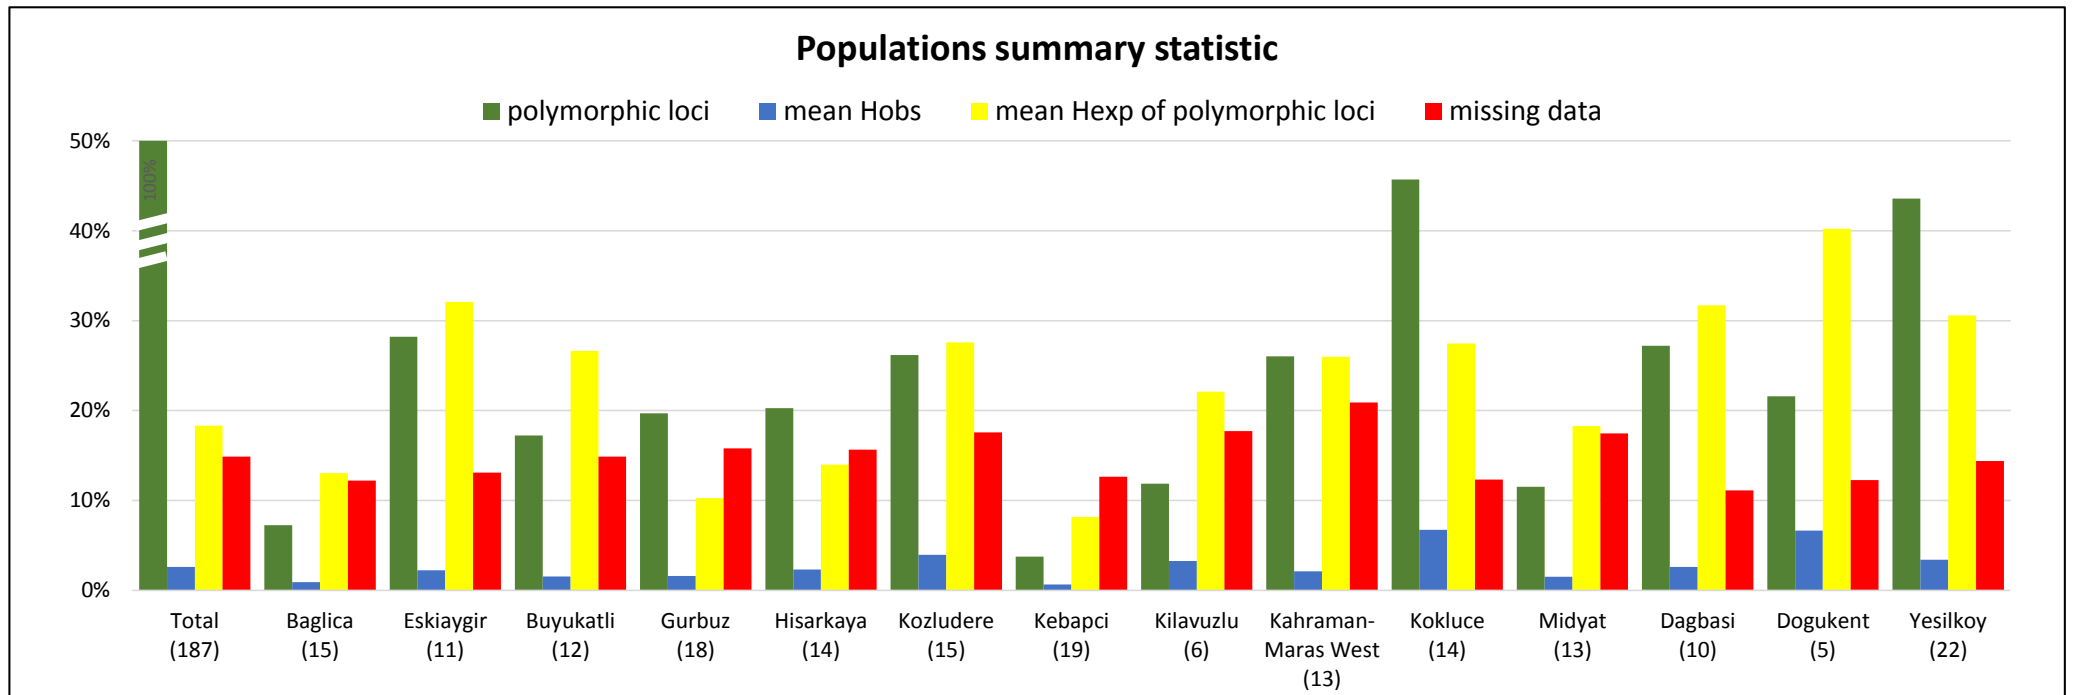

Supplement: pone.0194056.s004.pdf [file pone.0194056.s004.pdf]
