# Supplementary material for: Genetic structure of wild pea (Pisum sativum subsp. elatius) populations in the northern part of the Fertile Crescent reflects moderate cross-pollination and strong effect of geographic but not environmental distance
Source: PubMed Central journal article supplement (PMC5868773; doi:10.1371/journal.pone.0194056), 2018-03-26
Supplement: pone.0194056.s002.pdf [file pone.0194056.s002.pdf]

S1 Table: GPS data for 59 wild pea populations.

| Nr. | Populations        | lat_dd   | lon_dd   | elevation |                                                 |
|-----|--------------------|----------|----------|-----------|-------------------------------------------------|
| 1   | Dagbasi            | 38,00960 | 39,29622 | 705       | this study - analyzed molecularly               |
| 2   | Eskiaygir          | 37,61490 | 37,08429 | 1270      |                                                 |
| 3   | Buyukatli          | 37,98824 | 39,14925 | 980       |                                                 |
| 4   | Kokluce            | 37,91476 | 38,98063 | 721       |                                                 |
| 5   | Midyat             | 37,33366 | 41,48435 | 807       |                                                 |
| 6   | Kilavuzlu          | 37,63202 | 36,83008 | 834       |                                                 |
| 7   | Kozludere          | 37,61652 | 37,07967 | 1200      |                                                 |
| 8   | KahramanMaras West | 37,62216 | 36,83250 | 782       |                                                 |
| 9   | Baglica            | 37,52643 | 40,71297 | 845       |                                                 |
| 10  | Kebapci            | 37,53588 | 40,52863 | 900       |                                                 |
| 11  | Gurbuz             | 37,64067 | 41,42828 | 825       |                                                 |
| 12  | Hisarkaya          | 37,63360 | 40,88912 | 730       |                                                 |
| 13  | Dogukent           | 37,57287 | 39,81868 | 1430      |                                                 |
| 14  | Yesilkoy           | 37,59833 | 40,48498 | 900       |                                                 |
| 15  |                    | 37,34506 | 43,24265 |           | additional populations used for niche modelling |
| 16  |                    | 37,36389 | 41,42576 |           |                                                 |
| 17  |                    | 37,36724 | 40,87968 |           |                                                 |
| 18  |                    | 37,37070 | 40,87814 |           |                                                 |
| 19  |                    | 37,43426 | 40,63714 |           |                                                 |
| 20  |                    | 37,45595 | 42,64077 |           |                                                 |
| 21  |                    | 37,49636 | 40,65394 |           |                                                 |
| 22  |                    | 37,50189 | 41,57991 |           |                                                 |
| 23  |                    | 37,50349 | 41,16291 |           |                                                 |
| 24  |                    | 37,51923 | 40,69223 |           |                                                 |
| 25  |                    | 37,52129 | 43,48968 |           |                                                 |
| 26  |                    | 37,53318 | 41,72582 |           |                                                 |
| 27  |                    | 37,53569 | 43,50309 |           |                                                 |
| 28  |                    | 37,53641 | 40,83262 |           |                                                 |
| 29  |                    | 37,54456 | 41,01693 |           |                                                 |
| 30  |                    | 37,55475 | 41,06721 |           |                                                 |
| 31  |                    | 37,55475 | 41,06721 |           |                                                 |
| 32  |                    | 37,55563 | 42,42590 |           |                                                 |
| 33  |                    | 37,56468 | 43,52921 |           |                                                 |
| 34  |                    | 37,56477 | 43,52922 |           |                                                 |
| 35  |                    | 37,68947 | 42,30453 |           |                                                 |
| 36  |                    | 37,71429 | 42,25953 |           |                                                 |
| 37  |                    | 37,71438 | 42,25877 |           |                                                 |
| 38  |                    | 37,71447 | 42,25854 |           |                                                 |
| 39  |                    | 37,76473 | 42,10969 |           |                                                 |
| 40  |                    | 37,86402 | 39,05476 |           |                                                 |
| 41  |                    | 37,86913 | 39,00184 |           |                                                 |
| 42  |                    | 37,89473 | 39,01060 |           |                                                 |
| 43  |                    | 37,92821 | 39,00891 |           |                                                 |
| 44  |                    | 37,95642 | 39,01755 |           |                                                 |
| 45  |                    | 37,95647 | 39,01905 |           |                                                 |
| 46  |                    | 37,95666 | 39,01966 |           |                                                 |
| 47  |                    | 37,97206 | 39,07275 |           |                                                 |
| 48  |                    | 37,97836 | 39,07547 |           |                                                 |
| 49  |                    | 38,10712 | 39,46966 |           |                                                 |
| 50  |                    | 38,15992 | 40,08725 |           |                                                 |
| 51  |                    | 38,20356 | 39,60833 |           |                                                 |
| 52  |                    | 38,22328 | 39,65478 |           |                                                 |
| 53  |                    | 38,22339 | 39,65487 |           |                                                 |
| 54  |                    | 38,25390 | 41,95905 |           |                                                 |
| 55  |                    | 38,27453 | 40,06357 |           |                                                 |
| 56  |                    | 38,29140 | 39,74428 |           |                                                 |
| 57  |                    | 38,33601 | 39,70739 |           |                                                 |
| 58  |                    | 38,33634 | 39,70676 |           |                                                 |
| 59  |                    | 38,56469 | 39,79259 |           |                                                 |
