# Supplementary material for: Genetic structure of wild pea (Pisum sativum subsp. elatius) populations in the northern part of the Fertile Crescent reflects moderate cross-pollination and strong effect of geographic but not environmental distance
Source: PubMed Central journal article supplement (PMC5868773; doi:10.1371/journal.pone.0194056), 2018-03-26
Supplement: pone.0194056.s005.pdf [file pone.0194056.s005.pdf]

## S4 Table

Inter-population pairwise Fst (above diagonal, ANOVA approach) and geographical distances (bellow diagonal, km)

|                   | Baglica | Eskiaygir | Buyukatli | Gurbuz | Hisarkaya | Kozludere | Kebapci | Kilavuzlu | KahramanMarasWest | Kokluce | Midyat | Dagbasi | Dogukent | Yesilkoy |
|-------------------|---------|-----------|-----------|--------|-----------|-----------|---------|-----------|-------------------|---------|--------|---------|----------|----------|
| Baglica           |         | 0.66      | 0.82      | 0.89   | 0.87      | 0.77      | 0.94    | 0.91      | 0.86              | 0.54    | 0.87   | 0.67    | 0.76     | 0.40     |
| Eskiaygir         | 259     |           | 0.53      | 0.68   | 0.63      | 0.56      | 0.71    | 0.63      | 0.58              | 0.20    | 0.58   | 0.32    | 0.35     | 0.24     |
| Buyukatli         | 147     | 126       |           | 0.79   | 0.75      | 0.67      | 0.85    | 0.77      | 0.72              | 0.44    | 0.76   | 0.55    | 0.49     | 0.40     |
| Gurbuz            | 64      | 322       | 204       |        | 0.57      | 0.75      | 0.92    | 0.87      | 0.82              | 0.58    | 0.86   | 0.70    | 0.58     | 0.49     |
| Hisarkaya         | 20      | 274       | 158       | 47     |           | 0.71      | 0.90    | 0.84      | 0.78              | 0.52    | 0.83   | 0.65    | 0.56     | 0.46     |
| Kozludere         | 320     | 61        | 186       | 383    | 335       |           | 0.81    | 0.44      | 0.31              | 0.50    | 0.73   | 0.58    | 0.55     | 0.48     |
| Kebapci           | 16      | 243       | 131       | 80     | 34        | 304       |         | 0.94      | 0.90              | 0.60    | 0.91   | 0.36    | 0.81     | 0.53     |
| Kilavuzlu         | 342     | 83        | 208       | 405    | 357       | 22        | 326     |           | 0.53              | 0.55    | 0.85   | 0.65    | 0.66     | 0.52     |
| KahramanMarasWest | 342     | 83        | 208       | 405    | 357       | 22        | 326     | 1         |                   | 0.50    | 0.80   | 0.59    | 0.57     | 0.48     |
| Kokluce           | 158     | 110       | 17        | 217    | 171       | 170       | 143     | 192       | 192               |         | 0.43   | 0.25    | 0.26     | 0.15     |
| Midyat            | 71      | 329       | 218       | 34     | 62        | 390       | 87      | 412       | 412               | 230     |        | 0.61    | 0.68     | 0.45     |
| Dagbasi           | 23      | 276       | 167       | 57     | 29        | 336       | 36      | 358       | 358               | 178     | 54     |         | 0.37     | 0.24     |
| Dogukent          | 79      | 180       | 75        | 142    | 95        | 241       | 63      | 263       | 263               | 83      | 149    | 96      |          | 0.16     |
| Yesilkoy          | 22      | 239       | 125       | 83     | 36        | 300       | 8       | 322       | 322               | 137     | 93     | 43      | 59       |          |
